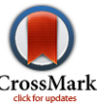

# Successful Conversion of the *Bacillus subtilis* BirA Group II Biotin Protein Ligase into a Group I Ligase

Sarah K. Henke<sup>1</sup>, John E. Cronan<sup>1,2\*</sup>

**1** Department of Microbiology, University of Illinois, Urbana, Illinois, United States of America, **2** Department of Biochemistry, University of Illinois, Urbana, Illinois, United States of America

## Abstract

Group II biotin protein ligases (BPLs) are characterized by the presence of an N-terminal DNA binding domain that allows transcriptional regulation of biotin biosynthetic and transport genes whereas Group I BPLs lack this N-terminal domain. The *Bacillus subtilis* BPL, BirA, is classified as a Group II BPL based on sequence predictions of an N-terminal helix-turn-helix motif and mutational alteration of its regulatory properties. We report evidence that *B. subtilis* BirA is a Group II BPL that regulates transcription at three genomic sites: *bioWAFDBI*, *yuiG* and *yhfUTS*. Moreover, unlike the paradigm Group II BPL, *E. coli* BirA, the N-terminal DNA binding domain can be deleted from *Bacillus subtilis* BirA without adverse effects on its ligase function. This is the first example of successful conversion of a Group II BPL to a Group I BPL with retention of full ligase activity.

**Citation:** Henke SK, Cronan JE (2014) Successful Conversion of the *Bacillus subtilis* BirA Group II Biotin Protein Ligase into a Group I Ligase. PLoS ONE 9(5): e96757. doi:10.1371/journal.pone.0096757

**Editor:** Valerie de Crécy-Lagard, University of Florida, United States of America

**Received:** March 6, 2014; **Accepted:** April 7, 2014; **Published:** May 9, 2014

**Copyright:** © 2014 Henke and Cronan. This is an open-access article distributed under the terms of the Creative Commons Attribution License, which permits unrestricted use, distribution, and reproduction in any medium, provided the original author and source are credited.

**Data Availability:** The authors confirm that all data underlying the findings are fully available without restriction. All data are included in the manuscript.

**Funding:** This work was supported by National Institutes of Health Grant AI15650 from the National Institute of Allergy and Infectious Diseases. The funders had no role in study design, data collection and analysis, decision to publish, or preparation of the manuscript.

**Competing Interests:** The authors have declared that no competing interests exist.

\* E-mail: j-cronan@life.uiuc.edu

## Introduction

Biotin protein ligase (BPL) is required for the covalent attachment of biotin to biotin-dependent enzymes. This attachment proceeds in a two-step reaction. First, BPL binds both biotin and ATP to synthesize biotinoyl-5'-AMP (Bio-5'-AMP, also called biotinoyl-adenylate) with release of pyrophosphate [1]. The ε-amino group of the conserved lysine residue of the acceptor protein acts as a nucleophile to attack the Bio-5'-AMP mixed anhydride bond to give covalently attached biotin plus AMP (Fig. 1). Microbial BPLs are readily placed into two groups [2]. Both groups have catalytic and C-terminal domains that show strong structural conservation [3–7] whereas Group II BPLs are characterized by addition of an N-terminal helix-turn-helix (HTH) DNA binding domain that permits transcriptional regulation of the biotin synthetic genes. *E. coli* BirA, the paradigm for regulation of biotin biosynthesis, is the best studied Group II BPL. Transcriptional repression of the *E. coli* biotin operon occurs when BirA accumulates Bio-5'-AMP because all biotin acceptor proteins have been biotinylated [8–10]. Bio-5'-AMP accumulation results in dimerization of BirA and subsequent DNA binding [6,11,12]. In all four *E. coli* BirA crystal structures [13–15] the HTH structure is spatially well removed from the other domains of the protein and thus deletion of the N-terminal DNA binding domain was expected to convert this Group II BPL into a fully functional Group I ligase. However, this was not the case: the resulting protein had severely compromised ligase activity [16]. This was also true for ligases having smaller N-terminal deletions [17].

The sequences of other Group II BPLs suggest such proteins are found in γ-Proteobacteria, Bacilli, and Clostridii [2], although only

the proteins from *E. coli* [6] and (very recently) *Staphylococcus aureus* [7] have been enzymatically characterized and crystallized. One of the Group II BPLs, *B. subtilis* BirA, has only 27% amino acid sequence identity to *E. coli* BirA (Fig. 2). Despite this low sequence identity, *Bacillus subtilis* *birA* has been shown to complement the ligase activity of a temperature-sensitive *E. coli* *birA85* strain [18]. Moreover, *B. subtilis* *birA* mutants show constitutive expression of a *bioW-lacZ* fusion, suggesting that BirA regulates biotin operon transcription [18]. *B. subtilis* microarray data identified two additional transcripts, *yuiG* and *yhfUST*, regulated by biotin and BirA [19]. Both YuiG and YhfU have strong sequence similarity to the structurally characterized BioY biotin transporter of *Lactococcus lactis* [20] and other well characterized energy-coupling factor (ECF) biotin transporters [21]. All three transcripts have similar predicted BirA binding sites [2,19]. *B. subtilis* has two known biotinylated proteins, pyruvate carboxylase (PyC) and the biotin carboxyl carrier protein (AccB) subunit of acetyl-CoA carboxylase (<http://genodb.pasteur.fr>). A third *B. subtilis* protein, biotin/lipoyl attachment protein (BLAP) encoded by the *yngHB* gene was found to be biotinylated and lipoylated when expressed in *E. coli* [22] although subsequently this protein was found not to be lipoylated by the *B. subtilis* enzymes that modify the known cognate lipoic acid acceptor proteins [23].

A major shortcoming of our picture of the enzymatic and *in vivo* regulatory activities of Group II BPLs is that it is based on a single example, *E. coli* BirA. For this reason we decided to study the enzymatic and regulatory properties of the BirA of *B. subtilis*, a bacterium that is evolutionarily diverse from *E. coli*. Moreover the amino acid sequence of *B. subtilis* BirA differs markedly from that of the *E. coli* protein and *in vivo* *B. subtilis* BirA biotinylates multiple proteins whereas *E. coli* BirA modifies only a single protein. Here

we report that *B. subtilis* BirA is a Group II BPL that follows the *E. coli* model of regulation, but unlike the *E. coli* protein, *B. subtilis* BirA can be successfully converted into a fully active Group I BPL.

## Materials and Methods

### Strains chemicals and culture media

The bacterial strains used were derivatives of *B. subtilis* 168 and *E. coli* K-12 (Table 1). The rich medium used to grow *E. coli* and *B. subtilis* was LB. The defined medium for *E. coli* was M9 salts supplemented with 0.5% glucose and 0.01% vitamin-free Casamino Acids (Difco) whereas the defined medium for *B. subtilis* was Spizizen salts [24] supplemented with 0.5% glycerol and 0.05% vitamin-free Casamino Acids (Difco) in addition to 0.01% each of tryptophan, tyrosine, isoleucine and phenylalanine. Antibiotics were used at the following concentrations (in  $\mu\text{g ml}^{-1}$ ): sodium ampicillin, 100; kanamycin sulfate, 50; chloramphenicol, 25; tetracycline HCl, 12; erythromycin, 100; lincomycin, 12.5; streptomycin sulfate, 50 and spectinomycin sulfate, 50. The 15:1 mixture of ticarcillin disodium salt and potassium clavulanate (Research Products International) was used at  $25 \mu\text{g ml}^{-1}$ . Oligonucleotides were purchased from Integrated DNA Technologies. PCR amplification was performed using Taq polymerase (New England BioLabs) and *Pfu* polymerase (Stratagene) according to the manufacturer's specifications. DNA constructs were sequenced by ACGT, Inc. Reagents and chemicals were obtained from Sigma-Aldrich and Fisher, unless otherwise noted. New England BioLabs supplied restriction enzymes and T4 DNA ligase. Life Technologies provided SYBER Green I Nucleic Acid Gel stain and the 6% DNA Retardation Novex TBE Gels. Perkin Elmer provided [ $\alpha$ - $^{32}\text{P}$ ]ATP (6,000 Ci/mmol). Analtech TLC Uniplates of microcrystalline cellulose matrix were purchased from Sigma-Aldrich.

### Plasmids and plasmid constructions

The plasmids used and constructed are given in Table 2. The *B. subtilis* *birA* gene was amplified by PCR from *B. subtilis* strain 168 genomic DNA with primers SKH001 and SKH002 (all primers are given in Table 3) that added NdeI and XhoI sites. The product was digested with NdeI and XhoI and ligated into the same sites of pET19b, with an N-terminal hexahistidine tag to give pSKH001.

The C-terminal 86 residues of *B. subtilis* AccB (AccB-86) were amplified by PCR from *B. subtilis* strain 168 genomic DNA with primers SKH005 and SKH006 that added NcoI and XhoI sites. The product was digested with NcoI and XhoI and ligated into the same sites of pET-28 to give pSKH003 which encoded the untagged protein. The C-terminal 77 residues of *B. subtilis* PyC (PyC-77) were amplified by PCR from *B. subtilis* strain 168 genomic DNA with primers SKH007 and SKH009 and inserted into pET-28 by the same procedures.

*B. subtilis* BirA,  $\Delta$ 2-64 BirA,  $\Delta$ 2-66 BirA,  $\Delta$ 2-74 BirA, and  $\Delta$ 1-81 BirA were amplified by PCR from *B. subtilis* strain 168 genomic DNA with forward primers SKH038, SKH036, SKH046, SKH048, SKH045, respectively, plus reverse primer SKH037. The primers added EcoRI and Sall sites. The products were digested with EcoRI and Sall and ligated into the same sites of pBAD322K, to give pSKH006, pSKH005, pSKH009, pSKH010 and pSKH011, respectively. The products were also ligated into the same sites of pBAD322Cm to give pSKH013, pSKH012, pSKH016, pSKH017 and pAKH018, respectively. *E. coli* BirA and  $\Delta$ 2-64 BirA were amplified by PCR from *E. coli* MG1655 genomic DNA with primers SKH049 and SKH043, and SKH042 and SKH043, respectively, thereby adding EcoRI and Sall sites. The products were digested with EcoRI and Sall and ligated into

the same sites of pBAD322K, to give pSKH008 and pSKH007 respectively. The products were also ligated into the same sites of pBAD322Cm to give pSKH015 and pSKH014 respectively.

*B. subtilis*  $\Delta$ 2-64 BirA,  $\Delta$ 2-66 BirA,  $\Delta$ 2-74 BirA, and  $\Delta$ 1-81 BirA were amplified by PCR from *B. subtilis* strain 168 genomic DNA with forward primers SKH040, SKH047, SKH050, SKH044, respectively plus reverse primer SKH041. The primers added NdeI and XhoI sites. The products were digested with NdeI and XhoI and ligated into the same sites of pET-19b, adding an N-terminal hexahistidine-tag, to give pSKH019, pSKH020, pSKH021, and pSKH022, respectively.

A 500 base pair internal fragment of *B. subtilis* *bioW* was PCR amplified from *B. subtilis* strain 168 genomic DNA with primers SKH057 and SKH058 that added EcoRI and BamHI sites. The product was digested with EcoRI and BamHI and ligated into the same sites of pMUTIN4 to give pSKH023.

*B. subtilis* *accB-86* was PCR amplified from strain 168 genomic DNA with primer SKH069 which added a HindIII and a strong RBS site (AAGGAGGAAAAAATATG) plus primer SKH070 which contained a SphI site. The product was digested with HindIII and SphI and ligated into the same sites of pDR111 to give pSKH0024.

### *Bacillus subtilis* strain construction

*B. subtilis* competent cell preparation and transformation were carried out as described by Dubnau and Davidoff-Abelson [25]. To create a *bioW-lacZ* chromosomal fusion, pSKH023 was transformed into strain 1A330 creating strain SKH001. Single crossover integration into *bioW* was verified by PCR and sequencing. To construct an IPTG inducible chromosomal copy of *accB-86*, strain SKH001 was transformed with linearized

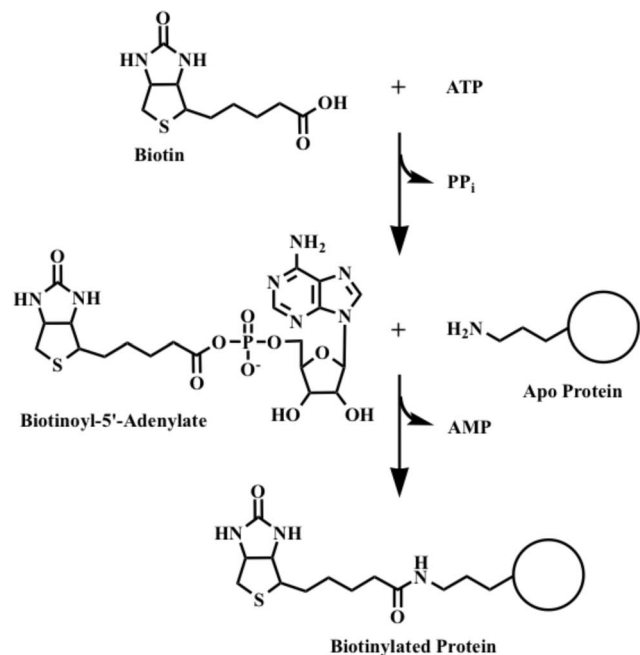

**Figure 1. The biotin protein ligase (BPL) reaction.** Attachment of biotin to acceptor proteins occurs in a two-step reaction. First, BirA binds biotin and ATP to synthesize Bio-5'-AMP (biotinoyl-5'-adenylate) with release of pyrophosphate. In the second step the conserved lysine residue of the acceptor protein acts as a nucleophile and attacks the mixed anhydride bond to give the biotinylated acceptor protein plus AMP.

doi:10.1371/journal.pone.0096757.g001

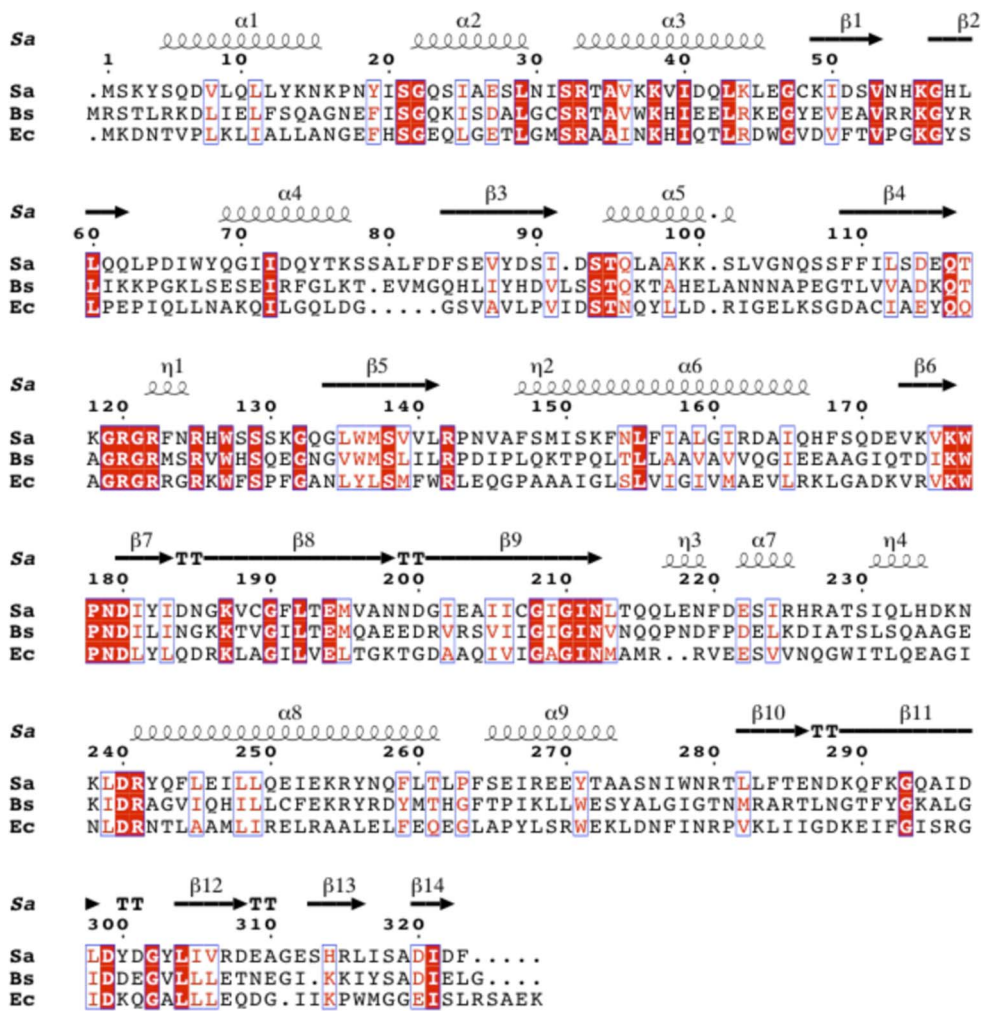

**Figure 2. Sequence alignments of *S. aureus* BPL, *B. subtilis* BirA and *E. coli* BirA.** *B. subtilis* BirA has 31% amino acid identity to *S. aureus* BPL and 27% amino acid identity to *E. coli* BirA. Conserved residues are in white text and highlighted in red and similar residues are in red text and boxed in blue. The *S. aureus* BPL secondary structure (PDB: 4DQ2) is shown above the amino acid sequence. doi:10.1371/journal.pone.0096757.g002

**Table 1. Bacterial strains.**

| Strain               | Relevant Genotype or Description                                                                                                                                                                                                                                                                            | Reference or Derivation |
|----------------------|-------------------------------------------------------------------------------------------------------------------------------------------------------------------------------------------------------------------------------------------------------------------------------------------------------------|-------------------------|
| <i>B. subtilis</i>   |                                                                                                                                                                                                                                                                                                             |                         |
| 168                  | <i>trpC2</i>                                                                                                                                                                                                                                                                                                | Lab collection          |
| 1A330                | <i>aroG932 bioB141</i>                                                                                                                                                                                                                                                                                      | BGSC                    |
| SKH001               | 1A330 <i>bioW::lacZ</i>                                                                                                                                                                                                                                                                                     | This study              |
| SKH002               | SKH001 <i>amyE::P spac accB-86</i>                                                                                                                                                                                                                                                                          | This study              |
| <i>E. coli</i>       |                                                                                                                                                                                                                                                                                                             |                         |
| MG1655               | <i>E. coli</i> K-12 wild type                                                                                                                                                                                                                                                                               | Lab collection          |
| DH5 $\alpha$         | $\Delta(\text{argF-lacZ})\text{U169 glnV44 } \Phi 80 \Delta(\text{lacZ})\text{M15 gyrA96 recA1 relA1 endA1 thi-1 hsdR17}$                                                                                                                                                                                   | Lab collection          |
| BM4092               | $[\text{araD139}]\text{B/r, } \Delta(\text{argF-lac})\text{169, } \lambda\text{-, TP}(\text{bioF-lacZ})\text{501, filhD5301, } \Delta(\text{fruK-yeiR})\text{725}(\text{fruA25}), \text{relA1, rpsL150}(\text{strR}), \text{rbsR22, birA1, } \Delta(\text{fimB-fimE})\text{632}(\text{:IS1}), \text{deoC1}$ | [33]                    |
| BL21 $\lambda$ (DE3) | <i>ompT, hsdSB (rB-, mB-), dcm, gal, </i> $\lambda$ <i>(DE3)</i>                                                                                                                                                                                                                                            | Novagen                 |
| VC618                | MG1655 $\Delta \text{ lacZY, bioF::lacZY, birA::Km}^R$ , pVC18                                                                                                                                                                                                                                              | [36]                    |
| VC832                | BL21 $\lambda$ (DE3), pVC36                                                                                                                                                                                                                                                                                 | [17]                    |

doi:10.1371/journal.pone.0096757.t001

**Table 2.** Plasmids.

| Plasmid   | Relevant Genotype or Description                                              | Reference or Derivation |
|-----------|-------------------------------------------------------------------------------|-------------------------|
| pET19b    | T7 promoter expression vector, AmpR                                           | Novagen                 |
| pSKH001   | pET19b Encoding N-terminal hexahistidine tagged <i>B. subtilis</i> BirA, AmpR | This study              |
| pET28b    | T7 promoter expression vector, KanR                                           | Novagen                 |
| pSKH003   | pET28 encoding accB-86                                                        | This study              |
| pSKH004   | pET28 encoding pyc-77                                                         | This study              |
| pQC026    | pET28b encoding C-terminal Hexahistidine tagged BLAP                          | [23]                    |
| pBAD322K  | Medium copy expression vector, KanR                                           | [48]                    |
| pSKH005   | pBAD322K encoding <i>B. subtilis</i> 64-325                                   | This study              |
| pSKH006   | pBAD322K encoding <i>B. subtilis</i> WT BirA                                  | This study              |
| pSKH007   | pBAD322K encoding <i>E. coli</i> BirA 66-321                                  | This study              |
| pSKH008   | pBAD322K encoding <i>E. coli</i> WT BirA                                      | This study              |
| pSKH009   | pBAD322K encoding <i>B. subtilis</i> 66-325                                   | This study              |
| pSKH010   | pBAD322K encoding <i>B. subtilis</i> 75-325                                   | This study              |
| pSKH011   | pBAD322K encoding <i>B. subtilis</i> 82-325                                   | This study              |
| pBAD322Cm | Medium copy expression vector, CmR                                            | [48]                    |
| pSKH012   | pBAD322Cm encoding <i>B. subtilis</i> 64-325                                  | This study              |
| pSKH013   | pBAD322Cm encoding <i>B. subtilis</i> WT BirA                                 | This study              |
| pSKH014   | pBAD322Cm encoding <i>E. coli</i> BirA 66-321                                 | This study              |
| pSKH015   | pBAD322Cm encoding <i>E. coli</i> WT BirA                                     | This study              |
| pSKH016   | pBAD322Cm encoding <i>B. subtilis</i> 66-325                                  | This study              |
| pSKH017   | pBAD322Cm encoding <i>B. subtilis</i> 75-325                                  | This study              |
| pSKH018   | pBAD322Cm encoding <i>B. subtilis</i> 82-325                                  | This study              |
| pSKH019   | pET19b encoding N-terminal hexahistidine tagged BirA 64-325, AmpR             | This study              |
| pSKH020   | pET19b encoding N-terminal hexahistidine tagged BirA 66-325, AmpR             | This study              |
| pSKH021   | pET19b encoding N-terminal hexahistidine tagged BirA 75-325, AmpR             | This study              |
| pSKH022   | pET19b encoding N-terminal hexahistidine tagged BirA 82-325, AmpR             | This study              |
| pMUTIN4   | spoVG-lacZ, ermR                                                              | [49]                    |
| pDR111    | SpcR, 5'-amyE, 3'-amyE, phyper-spark                                          | G. W. Ordal             |
| pSKH023   | pMUTIN4 encoding <i>B. subtilis</i> bioW internal 500 bp fragment             | This study              |
| pSKH024   | pDR111 encoding <i>B. subtilis</i> accB-86                                    | This study              |

doi:10.1371/journal.pone.0096757.t002

pSKH024 creating strain SKH002. Double crossover integration into *amyE* was verified by the amylase production screen of Harwood and Cutting [26]. Integration was also verified by PCR and by sequencing with primers SKH065 and SKH066, SKH067 and SKH075 and SKH073 and SKH074.

### Structural modeling and sequence alignment

The *B. subtilis* AccB biotin attachment domain was identified by InterProScan [27] and structural modeling to *E. coli* AccB-87 crystal structure (PDB 1A6X) using Swiss-Model automated mode [28-30]. The *B. subtilis* PyC biotin attachment domain was identified by InterProScan [27] and structural modeling to the *Staphylococcus aureus* pyruvate carboxylase biotin attachment domain crystal structure (3HBL) using Swiss-Model as above. *B. subtilis* BirA N-terminal deletions were determined by modeling to *S. aureus* BirA crystal structure (4DQ2) as a template using Swiss-Model automated mode as above. The final image was created using UCSF Chimera package [31]. Sequence alignments were created using the Clustal Omega (<http://www.ebi.ac.uk/Tools/msa/clustalo/>) and the output was processed by ESPript 3.0

(<http://esprict.ibcp.fr/ESPript/cgi-bin/ESPript.cgi>) to generate the final figure [32].

### Complementation analyses

Two *E. coli* *birA* strains were tested. In the more straightforward test strain BM4092 [33] was transformed with either plasmid pSKH001 or pSKH002 followed by selection for transformants by plating on LB supplemented with ampicillin or kanamycin, respectively. These strains were grown at 37°C on M9 minimal plates [34] with 25 µM 5-bromo-4-chloro-indolyl-β-D-galactopyranoside (X-gal) and varying concentrations of biotin (1.6 nM, 4.1 nM, 41 nM, 4.1 µM, or 41 µM) [33]. Note that gene expression from T7 promoter based multi-copy plasmids in the absence of T7 RNA polymerase has been shown to be equivalent to that of a single copy plasmid [35]. Derivatives of strain BM4092 expressing the mutant BirAs encoded by kanamycin resistant plasmids pSKH005, pSKH006, pSKH007, pSKH008, pSKH009, pSKH010 or pSKH011 were similarly obtained and tested.

Strain VC618 which carries a deletion of the chromosomal *birA* gene was transformed with pSKH012, pSKH013, pSKH014, pSKH015, pAKH016, pSKH017, or pSKH018 and transfor-

**Table 3.** Oligonucleotides utilized.

| Oligo-nucleotide | Description            | Sequence                                      |
|------------------|------------------------|-----------------------------------------------|
| SKH001           | BirA F NdeI            | GAGTGGCTGAACATATGCGGTCAAC                     |
| SKH002           | BirA stop R XhoI       | GGCTGTACCTCGAGTTAGCCCAATTC                    |
| SKH005           | accB F NcoI            | CCATGGAAAAGCAAGATGAGAATCTGCATAAA              |
| SKH006           | accB stop R XhoI       | CTCGAGCTTACTCCGCTTTTACAAGAAATAGAGG            |
| SKH007           | pyc F NcoI             | CCATGGAACGGACAAATCCAAGCCAC                    |
| SKH009           | pyc stop R XhoI        | CTCGAGTTTATGCTTTTTCAATTTCAAGGAGC              |
| SKH014           | bioO F                 | GATCCTTTCTTCTATTGACAGAAAC                     |
| SKH015           | bioO R                 | CGC CCTTCTACTGATAACTGAAGAAC                   |
| SKH016           | yhfU F                 | ACCATCAAAAACCGGTCTGCCATAC                     |
| SKH017           | yhfU R                 | CCAAAAAGTAATCAAATATGTTTATAC                   |
| SKH018           | yuiG F                 | ATTGATCGGACTGTCTTGTT                          |
| SKH019           | yuiG R                 | CCCTTAGGTTGACATACACA                          |
| SKH026           | EC bioO F              | GATATGGCGTTGGTCAAAGGCAAG                      |
| SKH027           | EC bioO R              | GGGGCTTCTCCAAAACGTGTTTTTTG                    |
| SKH034           | bioO half F            | GAAAAAGACCGTTTTGTGTG                          |
| SKH035           | bioO half R            | ATTCAAAGGTTAAACAATTAGAATATATTATTCTCTCCTG      |
| SKH028           | Non 125 F              | GCATGACGGTTAGCATACAAATGGCAG                   |
| SKH029           | Non 125 R              | AACGATCGGGATTTCCATTTTCATCGATTC                |
| SKH036           | BirA 64-325 EcoRI F    | ACTGCGAATTCACCATGAAACCCGGAAAACACTCAGTGAAAGCG  |
| SKH037           | BirA Sall R            | ACTGAGTCGACTTAGCCCAATTCGATATCGGCAG            |
| SKH038           | BirA EcoRI F           | CTGACGAATTCACCATGCGGTCAACATTAAGAAAAGACC       |
| SKH040           | BirA 64-325 NdeI F     | CAGTCCATATGAAACCCGGAAAACACTCAGTGAAAG          |
| SKH041           | BirA BamHI R           | ACTGGGATCCTTAGCCCAATTCGATATCG                 |
| SKH042           | EC BirA 65-321 EcoRI F | ACTGCGAATTCACCATGCAGTTACTTAATGCTAAACAGATATTG  |
| SKH043           | EC BirA Sall R         | CAGTCGTCGACTTATTTTTCTGCACTACGCAG              |
| SKH044           | BirA 82-325 NdeI F     | ACGTACATATGGCCAGCATCTTATTTACCATG              |
| SKH045           | BirA 82-325 EcoRI F    | AGCTAGAATTCACCATGGGCCAGCATCTTATTTAC           |
| SKH046           | BirA 66-325 EcoRI F    | ACTGCGAATTCACCATGGGAAAACACTCAGTGAAAGCG        |
| SKH047           | BirA 66-325 NdeI F     | CAGTCCATATGGGAAAACACTCAGTGAAAGCG              |
| SKH048           | BirA 75-325 EcoRI F    | ACTGCGAATTCACCATGTTTGATTAAAAACGGAAAG          |
| SKH049           | EC BirA EcoRI F        | ACTGGAATTCACCATGAAGGATAACACCGTGCCAC           |
| SKH050           | BirA 75-325 NdeI F     | CAGTCCATATGTTTGATTAAAAACGGAAAG                |
| SKH057           | bioW 500 F             | ACGTGAATTCATACAGTCAATGCTTTATTAG               |
| SKH058           | bioW 500 R             | GACTGGATCCCTTACCCGCAACATAGCCTG                |
| SKH065           | ycgB F                 | CTTACAGAAGAGCGGTAAAAGAGAATAAAAAAG             |
| SKH066           | lacI R                 | CCGTCTCACTGGTGAAAAGAAAAAC                     |
| SKH067           | ldH R                  | CATTGCTTTTTCTTATTTACATCAATGACCACAA            |
| SKH069           | RBS accb-86 F          | ACGGTCGACAAGGAGGAAAAAATATGGAAGCACCAAAGCAAGATG |
| SKH070           | accb-86 R              | GACGCATGCTTACTCCGCTTTTACAAGAAATAGAGGTTGTC     |
| SKH073           | pDR111 F Seq           | CTCGAGGGTAAATGTGAGCACTCAC                     |
| SKH074           | pDR111 R Seq           | GAAAGTATTACATATGTAAGATTTAAATGCAACCG           |
| SKH075           | specR F                | TGAATCTTCTCCATTAGAACATAGGGGAGAG               |
| MM1              | 5' BioW F              | CGA TCC TTT CTT CTA TTG ACA GAA ACA GG        |
| MM2              | LacZ R                 | GGT GTA GAT GGG CGC ATC GTA AC                |
| MM3              | pSPAC F                | CTA CAC AGC CCA GTC CAG ACT ATT CGG           |
| MM4              | 3' BioW R              | ATG GCG TCA TCT AGT TCT TTT TTG CGG           |

doi:10.1371/journal.pone.0096757.t003

strains were selected on LB plates supplemented with ampicillin and chloramphenicol at 30°C. These strains were cured of the temperature sensitive plasmid VC18 which expresses the *Saccharomyces cerevisiae* Bpl1 ligase by growth at 42°C on the defined medium supplemented with chloramphenicol and biotin. Loss of the temperature-sensitive plasmid was indicated by ampicillin sensitivity [36]. These strains were then grown at 37°C on M9 minimal plates [34] with 25 µM X-gal and varying concentrations of biotin as above [33].

### Protein purification

For purification of the wild type and *B. subtilis* N-terminally deleted BirA Proteins *E. coli* strain BL21 (λ DE3) was transformed with pSKH001, pSKH019, pSKH020, pSKH021, or pSKH022. The strains were grown at 37°C in LB medium supplemented with ticarcillin-clavulanate to an OD<sub>600</sub> of 0.8 and induced by addition of IPTG to 1 mM for an additional 6 h at 37°C. Cells were centrifuged and resuspended in lysis buffer which was 50 mM Tris-HCl, 500 mM NaCl, 0.1 mM tris(2-carboxyethyl)phosphine (TCEP), 10 mM imidazole, 5% glycerol, pH 8.0). The cells were lysed by passage through a French pressure cell and the lysate was centrifuged. The supernatant was added to Ni NTA beads (Qiagen) and incubated for 30 min. The mixture was added to a disposable 10 ml polypropylene column (Pierce) and washed with three column volumes of wash buffer (50 mM Tris-HCl, 500 mM NaCl, 0.1 mM TCEP, 60 mM imidazole, 5% glycerol, pH 8.0). BirA was eluted in 1 ml fractions with elution buffer (50 mM Tris-HCl, 500 mM NaCl, 0.1 mM TCEP, 250 mM imidazole, 5% glycerol, pH 8.0). Fractions were subjected to SDS-PAGE to determine purity. Pure fractions were combined and dialyzed against storage buffer (50 mM Tris-HCl, 500 mM NaCl, 0.1 mM TCEP, 5% glycerol, pH 8.0). Aliquots were flash frozen and stored at -80°C.

The *B. subtilis* acetyl-CoA carboxylase biotin carboxyl carrier protein biotin attachment domain (AccB-86) was purified from *E. coli* strain BL21 (λ DE3) transformed with pSKH003. The strain was grown at 37°C in LB medium supplemented with kanamycin to an OD<sub>600</sub> of 0.8 and induced by addition of IPTG to 1 mM for an additional 4 h at 30°C. The cells were centrifuged and resuspended in starting buffer (20 mM Tris-HCl, 1 mM NaCl, 0.1 mM TCEP, 5% glycerol, pH 8.0). The cells were lysed by passage through a French pressure cell. The lysates were centrifuged and the supernatant was subjected to 60% isopropanol precipitation followed by anion exchange chromatography using a HiTrap Q FF column (GE Healthcare) and fast liquid chromatography (AKTA) [37,38].

The *B. subtilis* pyruvate carboxylase biotin attachment domain (PyC-77) was purified *E. coli* strain BL21 (λ DE3) transformed with pSKH004. The strain was grown at 37°C in LB medium supplemented with kanamycin to an OD<sub>600</sub> of 0.8 and induced by addition of IPTG to 1 mM for an additional 4 h at 30°C. The cell were harvested by centrifugation and resuspended in starting buffer (50 mM sodium acetate, 100 mM NaCl, 0.1 mM TCEP, 5% glycerol, pH 4.9). The cells were lysed by passage through a French pressure cell and centrifuged. The supernatant was subjected to cation exchange chromatography using HiTrap SP FF column (GE Healthcare) and fast liquid chromatography (AKTA). PyC-77 was eluted by a NaCl gradient. Fractions were subjected to SDS-PAGE and fractions containing PyC-77 were combined and dialyzed against 50 mM 2-[4-(2-hydroxyethyl)piperazin-1-yl]ethanesulfonic acid (HEPES) buffer (pH 7.5) containing 500 mM NaCl and 0.1 mM TCEP. To further purify PyC-77 the protein was subjected to Superdex-75 size exclusion chromatography. Eluted fractions were analyzed by SDS-PAGE to

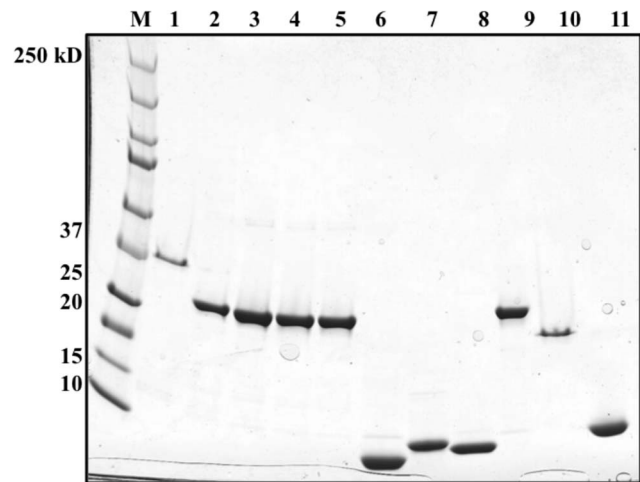

**Figure 3. Purification of the wild type and N-terminal deletion BirA proteins and the biotin acceptor proteins.** The proteins were purified as described in Materials and Methods and subjected to SDS-electrophoresis on a 4–20% polyacrylamide gel. M: molecular weight standards (Precision Plus Protein Standard Kaleidoscope from BioRad). Lane 1: *B. subtilis* N-terminally hexahistidine-tagged BirA (38.9 kDa). Lanes 2–5: *B. subtilis* N-terminally hexahistidine-tagged Δ2-63 BirA (31.8 kDa), Δ2-65 BirA (31.6 kDa), Δ2-74 BirA (30.4 kDa) and Δ1-81 BirA (29.7 kDa), respectively. Lanes 6–11 are the *B. subtilis* acceptor proteins AccB-86 (9.4 kDa), PyC-77 (8.3 kDa) and biotin lipoyl attachment protein (BLAP) (8.73 kDa). Lane 10 is *E. coli* C-terminal hexahistidine-tagged BirA. Lane 11 is *E. coli* C-terminal hexahistidine tagged Δ2-65 BirA (29.18 kDa) and lane 11 is *E. coli* AccB-87. doi:10.1371/journal.pone.0096757.g003

determine purity. Fractions containing pure PyC-77 were combined, dialyzed against 50 mM HEPES buffer (pH 7.5) containing 500 mM NaCl, 0.1 mM TCEP, and 5% glycerol, flash frozen and stored at -80°C.

Plasmid pQC026C a derivative of vector pET28b encoding a terminal hexahistidine tagged BLAP was transformed into *E. coli* strain BL21 (λ DE3). The strain was grown in LB medium to an OD<sub>600</sub> of 0.8 and induced by addition of IPTG to 1 mM for an additional 4 h. BLAP was purified by Ni<sup>2+</sup> affinity chromatography as previously described [23]. The C-terminal hexahistidine tagged Δ2-65 BirA was purified as previously described [17].

### Electrophoretic Mobility Shift Assays (EMSA) of DNA binding

The predicted *B. subtilis* BirA binding sites upstream of the coding sequences of *bioO*, *yhfU* and *yuiG* were PCR amplified from *B. subtilis* 168 genomic DNA with primers SKH014 and SKH015, SKH016 and SKH017 and SKH018 and SKH019, respectively. A DNA fragment containing one half-site of *B. subtilis bioO* was similarly amplified with primers SKH034 and SKH035. *E. coli bioO* was amplified with primers SKH026 and SKH027 from MG1655 genomic DNA. Negative control DNA (*blap*) was amplified from *B. subtilis* 168 genomic DNA with primers SKH028 and SKH029. All DNA fragments were 125 bp in length. The PCR products were sized on a 1.8% agarose gel and purified using a QIAquick PCR Purification Kit (Qiagen). DNA concentrations were determined at OD<sub>260</sub> by using a NanoDrop 2000c. Purified BirA was incubated with the small nucleophile hydroxylamine at neutral pH to cleave any Bio-5'-AMP bound in the active site [39] and then dialyzed against storage buffer. The reaction contained 50 mM Tris-HCl (pH 8.0), 1 mM EDTA, 50 mM NaCl, 10% glycerol, 40 nM DNA and various concen-

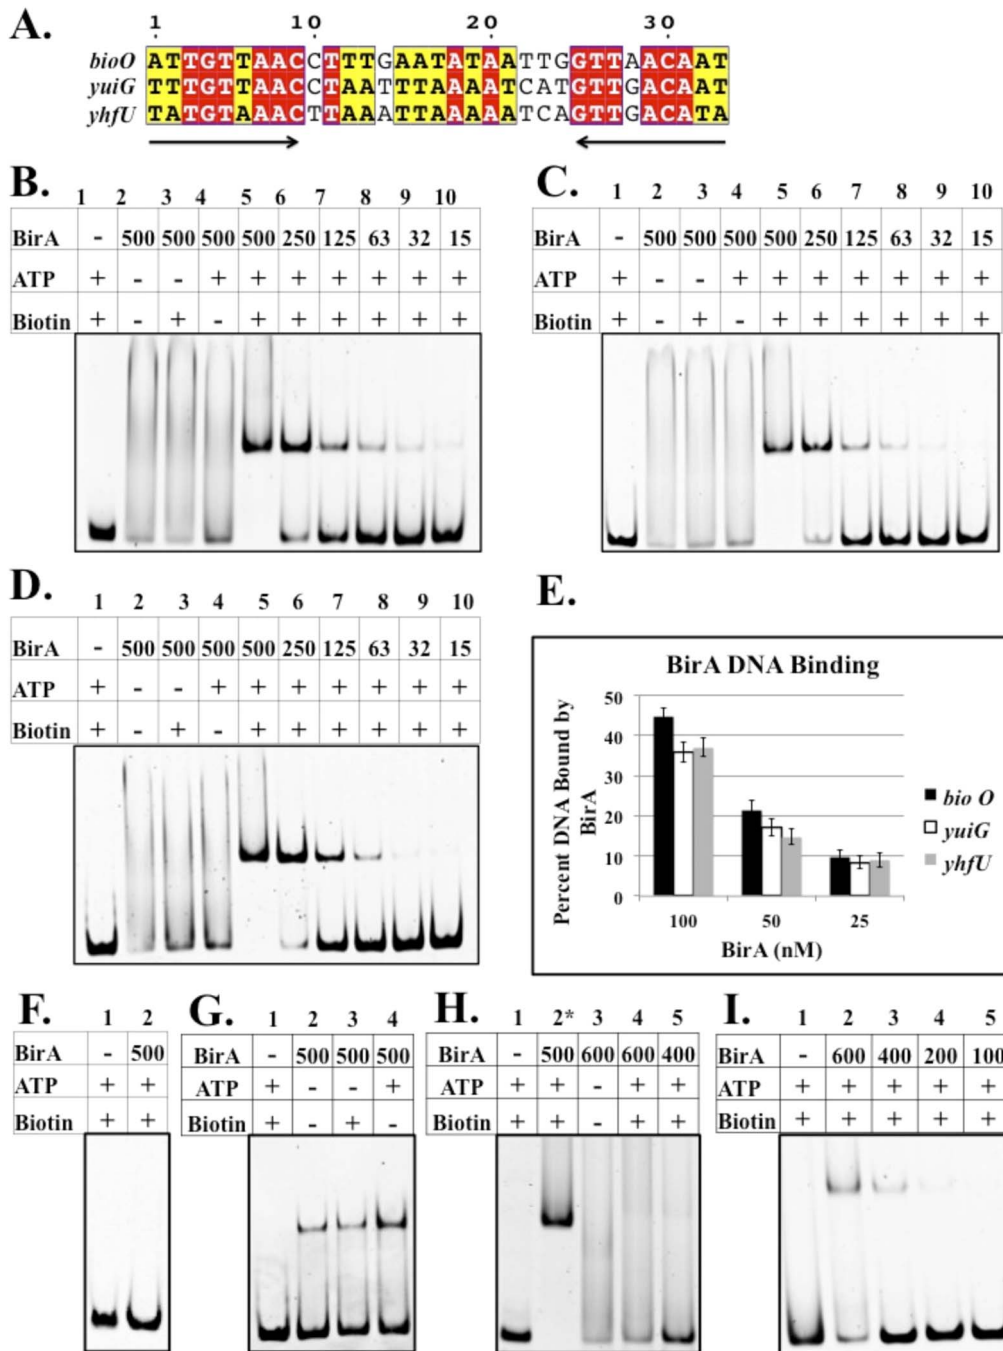

**Figure 4. Sequence alignments of *B. subtilis* BirA DNA binding sites and electrophoretic mobility shift assay of DNA binding by BirA.** *A.* *B. subtilis* has three predicted BirA DNA binding sites: 5' UTR of the *bioWAFDBI* operon, 5' UTR of *yuiG*, and 5' UTR of the *yhfUTS* operon. Conserved residues are highlighted in red and similar residues are highlighted in yellow. *B C* and *D.* *B. subtilis* BirA binding to *bioO*, the *yuiG* operator and the *yhfU* operator, respectively. Note that only in the presence of biotin and ATP is binding observed. *E.* Quantitation of DNA binding by BirA (Quantity One software). The results show the average of three independent experiments, and the error bars denote standard error of the mean. *F.* BirA binding to non-operator DNA (a 125 bp internal fragment of the *yingHB* gene that encodes BLAP). *G.* BirA binding to *bioO* without hydroxylamine treatment. Bio-5'-AMP accumulates in the active site during expression in *E. coli* and survives purification of BirA. *H.* *B. subtilis* BirA binding to a half site of the inverted repeat of *B. subtilis bioO*. Note lane 2 is positive control full-length *bioO*. *I.* *B. subtilis* BirA binding to *E. coli bioO*. A collection of all putative BirA binding sites in diverse bacteria can be found in the RegPrecise database (<http://regprecise.lbl.gov/RegPrecise/>). doi:10.1371/journal.pone.0096757.g004

trations of BirA (500 nM, 250 nM, 125 nM, 62.5 nM, 31.25 nM, 15.6 nM), 1 mM ATP, 1 mM MgCl<sub>2</sub>, and 1 μM biotin [36]. The binding reactions were incubated at room temperature for 30 min and then loaded into a 6% DNA retardation gel (Invitrogen). The

gel was run in 0.5X TBE at 100 V for 85 min. The gel was stained with SYBR Green I nucleic acid gel stain (Invitrogen) and visualized using Bio-Rad Chemidoc XRS and Quantity One software.

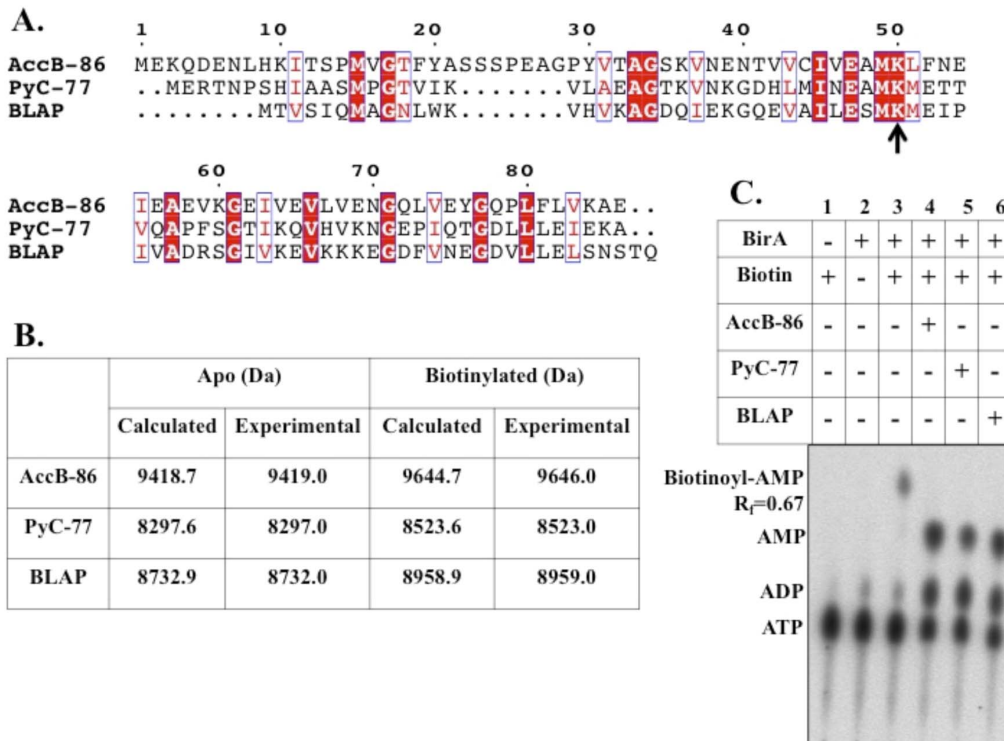

**Figure 5. *In vitro* biotinylation of the *B. subtilis* biotin acceptor proteins.** *A.* Sequence alignment of the *B. subtilis* biotinylated proteins. Conserved residues are in white text and highlighted in red and similar residues are in red text and boxed in blue. The black arrow indicates the conserved lysine residue that becomes biotinylated. *B.* Mass spectrometry values for purified acceptor proteins AccB-86, PyC-77, and BLAP. *C.* Thin layer chromatographic analysis of *B. subtilis* BirA ligase reaction: synthesis of Bio-5'-AMP and transfer of biotin to AccB-86, PyC-77, and BLAP. doi:10.1371/journal.pone.0096757.g005

### Chemical Cross-linking of BirA

Purified BirA was dialyzed against 50 mM HEPES buffer (pH 7.5) containing 500 mM NaCl, 0.1 mM TCEP and 5%

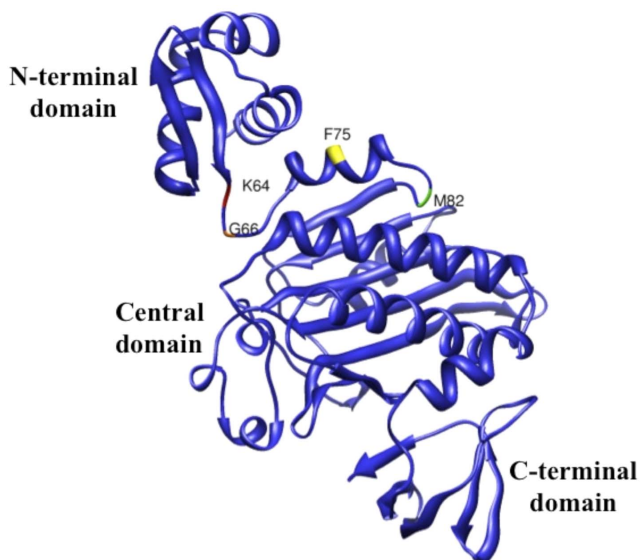

**Figure 6. Model of *B. subtilis* BirA based on the *S. aureus* BirA crystal structure (PDB 4DQ2) [7].** The UCSF Chimera package [31] was used to create the image. Residues corresponding to the N-terminal deletion end points are given. Modeled domains are indicated. doi:10.1371/journal.pone.0096757.g006

glycerol. BirA (30  $\mu$ M) was incubated with or without biotin (0.1 mM) and ATP (0.1 mM) at room temperature for 30 min. Various concentrations of ethylene glycol bis[succinimidylsuccinate] (EGS) (0.125, 0.25, 0.375, 0.5 mM) were added and incubated at room temperature for 30 min. SDS-loading dye was added and samples were heated to 99°C for 5 min. Samples were loaded on 4–20% gradient SDS polyacrylamide gels (Bio-Rad) and run at 110 v for 1 h.

### Mass Spectrometry

Purified acceptor proteins AccB-86, PyC-77, and BLAP (10  $\mu$ M), with or without incubation with BirA (0.5  $\mu$ M), ATP (3 mM), and biotin (250  $\mu$ M), were dialysed against 2 mM ammonium acetate, dried under a stream of nitrogen and subjected to electrospray mass spectrometric analysis [38].

### Bio-5'-AMP Synthesis Assays

The assays contained 50 mM Tris-HCl buffer (pH 8.0), 5.5 mM MgCl<sub>2</sub>, 100 mM KCl, 0.1 mM TCEP, 10  $\mu$ M ATP, 25  $\mu$ M biotin, 2.5  $\mu$ M BirA, 0.1  $\mu$ M [ $\alpha$ -<sup>32</sup>P]ATP and with or without 50  $\mu$ M AccB-86, PyC-77, or BLAP for a total reaction mixture of 20  $\mu$ l [17,36]. The reaction mixtures were incubated at room temperature for 30 min. A portion of each reaction mixture (1  $\mu$ l) was spotted on cellulose thin-layer chromatography (TLC) plates and developed in isobutyric acid-NH<sub>4</sub>OH-water (66:1:33) [40]. The thin-layer chromatograms were dried for 10 h and exposed to a phosphorimaging screen and visualized using a Fujifilm FLA-3000 Phosphor Imager and Fujifilm Image Gauge software.



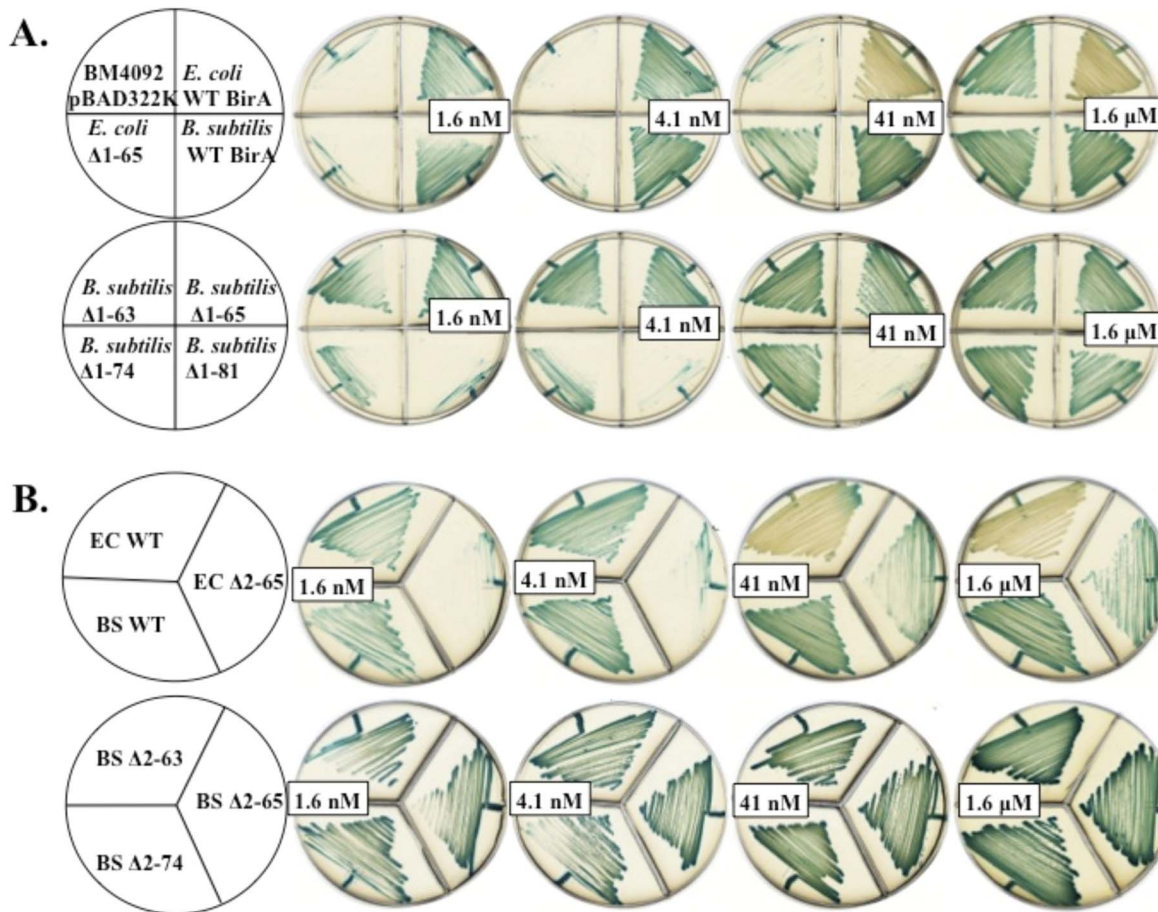

**Figure 7. Complementation of *E. coli* strains by expression of the BirA N-terminal deletion proteins.** **A.** Complementation of *E. coli* BirA mutant strain BM4092. **B.** Complementation of *E. coli*  $\Delta$ *birA* strain VC618. Strains were grown on M9 minimal medium containing different biotin concentrations (1.6 nM, 4.1 nM, 41 nM and 1.6  $\mu$ M) and X-gal. The blue color indicates transcription of *bioF-lacZ* fusion. The white colonies indicate transcriptional repression of the biotin operon by BirA binding at *bioO*. Note that *B. subtilis* wild type BirA does not complement the regulatory function of *E. coli* BirA and thus gives blue colonies. doi:10.1371/journal.pone.0096757.g007

### $\beta$ -Galactosidase Assays

Cultures were grown overnight in defined medium containing 1.6 nM biotin. The cultures were diluted to an OD<sub>595</sub> of 0.2 in defined media containing various concentrations of biotin (1.6, 4, 20, 40, 80, 400 nM, 4  $\mu$ M) and grown to OD<sub>595</sub> of 0.8 and induced with 1 mM IPTG for an additional 2 h.  $\beta$ -Galactosidase activity was determined as described by Harwood and Cutting for *Bacillus* following permeabilization with lysozyme [26].

## Results

### *B. subtilis* BirA is a Group II BPL that binds three operator sites

To test the relative affinities of the predicted *B. subtilis* BirA binding sites we purified the protein (Fig. 3) and performed electrophoretic mobility shift assays (EMSAs) on DNA fragments containing the three sites (Fig. 4A). Full dependence of binding on ATP and biotin required treatment of the protein with neutral hydroxylamine to remove Bio-5'-AMP accumulated in the active site during expression in *E. coli*. With the treated BirA binding of the biotin biosynthetic operator (*bioO*) was observed only in the presence of both biotin and ATP (Fig. 4B). BirA also bound the

*yhjU* and *yuiG* operators only in the presence of biotin and ATP (Fig. 4C, D). Although the three binding sites have slightly different DNA sequences (Fig. 4A), analysis of binding over a range of BirA concentrations showed that the three sites had very similar binding affinities (Fig. 4E). *B. subtilis* BirA failed to show non-specific DNA binding (Fig. 4F) as assayed by use of a fragment from the coding sequence of the *yngHB* gene. BirA preparations that had not undergone hydroxylamine treatment showed some interaction with *bioO* in the absence of biotin and ATP (Fig. 4G). BirA did not interact with a site that was composed of only one of the *B. subtilis* *bioO* inverted repeats suggesting that the form of BirA active in DNA binding is a dimer (Fig. 4H). *B. subtilis* BirA interacted only very weakly with the *E. coli* *bioO* DNA site (Fig 4I).

### *B. subtilis* BirA biotinylates three cognate proteins and the reactions proceed via Bio-5'-AMP

Each of the acceptor proteins, AccB-86, PyC-77 and BLAP (Fig. 5A), was purified after high-level expression in *E. coli* (Fig. 3). In the first two cases the N-terminal halves of the proteins were deleted to avoid protein aggregation during purification (the deleted segments are responsible for interaction with other proteins of the enzyme complexes and play no role in biotinyla-

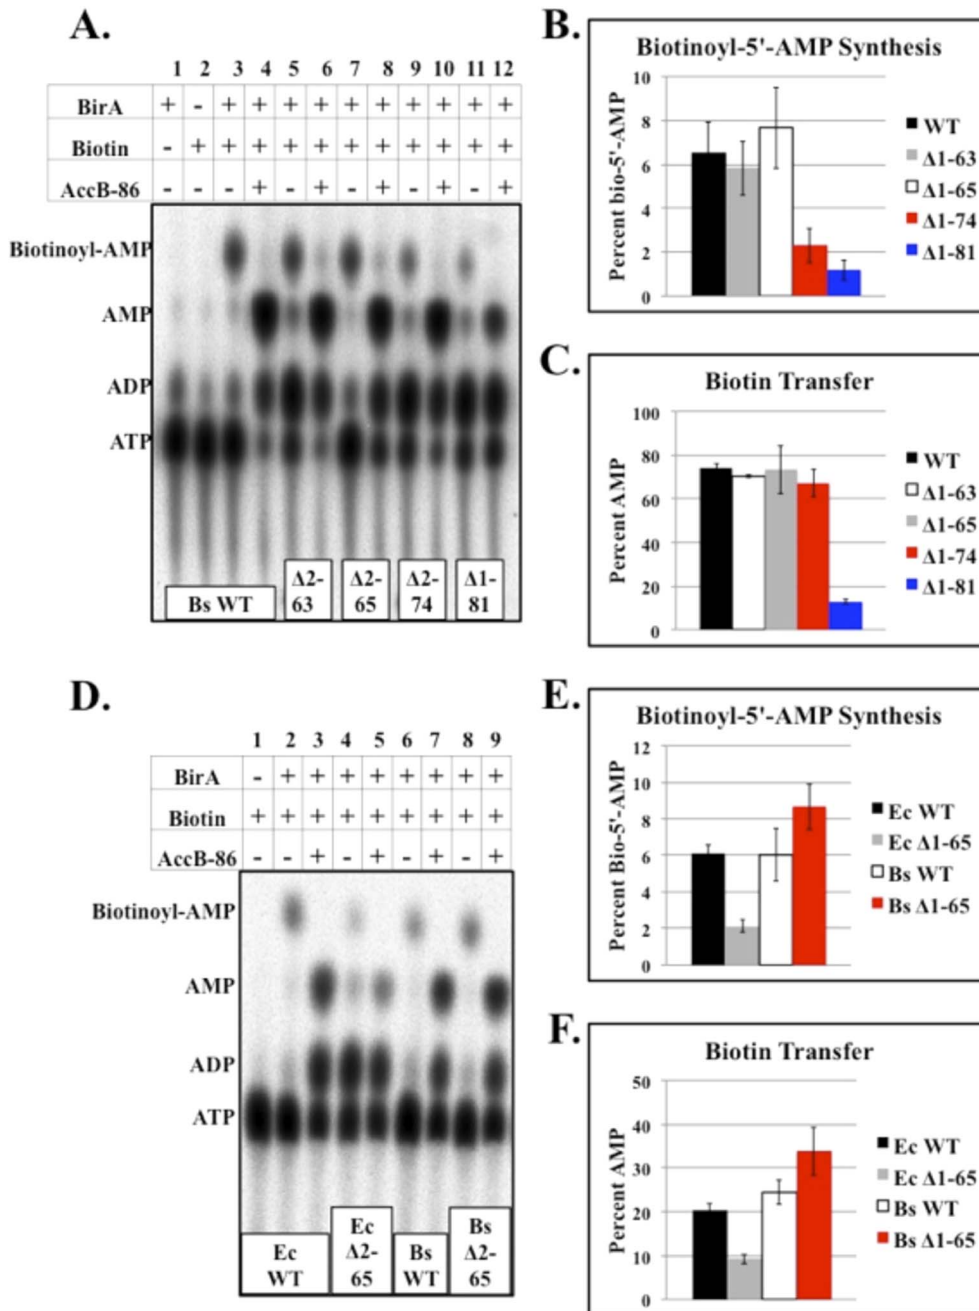

**Figure 8. In vitro biotinylation analyses of the BirA N-terminal deletion proteins.** *A.* Thin layer chromatographic analysis of wild type *B. subtilis* BirA and *B. subtilis* BirA N-terminal deletions with and without the addition of acceptor protein AccB-86. *B.* Quantitation of Bio-5'-AMP synthesis by wild type *B. subtilis* BirA and the *B. subtilis* BirA N-terminal deletion proteins. The results show the average of three independent experiments, and the error bars denote standard error of the mean. *C.* Quantitation of biotin transfer to AccB-86 by wild type *B. subtilis* BirA and *B. subtilis* BirA N-terminal deletions. The results show the average of three independent experiments, and the error bars denote standard error of the mean. *D.* Thin layer chromatographic analysis of wild type *E. coli* BirA, *E. coli* Δ2-65 BirA, wild type *B. subtilis* BirA, and *B. subtilis* Δ2-65 BirA. *E.* Quantitation of Bio-5'-AMP synthesis by wild type *E. coli* BirA, *E. coli* Δ2-65 BirA, wild type *B. subtilis* BirA, and *B. subtilis* Δ2-65 BirA. The results show the average of three independent experiments, and the error bars denote standard error of the mean. *F.* Quantitation of biotin transfer to *E. coli* AccB-87 or *B. subtilis* AccB-86 by wild type *E. coli* BirA, *E. coli* Δ2-65 BirA, wild type *B. subtilis* BirA and *B. subtilis* Δ2-65 BirA. The results show the average of three independent experiments, and the error bars denote standard error of the mean. doi:10.1371/journal.pone.0096757.g008

tion). Electrospray ionization mass spectrometry results matched the theoretical masses of the apo forms of the three proteins and showed that the preparations were free of the biotinylated forms (Fig. 5B). When the apo forms of AccB-86, PyC-77 and BLAP were incubated with ATP, biotin and purified *B. subtilis* BirA and

subsequently analyzed by mass spectrometry, mass values very similar to the theoretical values for biotinylated forms of all three acceptor protein were obtained (Fig. 5B). In the presence of α-<sup>32</sup>P-labeled ATP and biotin *B. subtilis* BirA formed labeled Bio-5'-AMP. Upon addition of any of the three acceptor proteins (AccB-

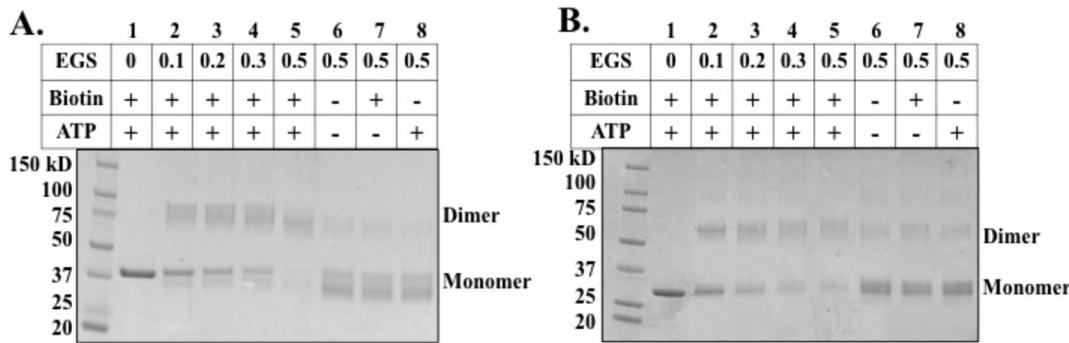

**Figure 9. Chemical crosslinking of the *B. subtilis* wild type and  $\Delta 2-65$  BirA proteins.** A. Wild type BirA. B. The  $\Delta 2-65$  BirA. Note that efficient dimer formation requires the presence of both biotin and ATP. The EGS concentrations are in mM. doi:10.1371/journal.pone.0096757.g009

86, PyC-77, or BLAP) the Bio-5'-AMP intermediate was no longer detected and AMP accumulated which indicated transfer of biotin to each of the acceptor proteins (Fig. 5C). In conclusion, we have experimentally verified the bioinformatic analyses of the genes regulated by *B. subtilis* BirA and the proteins modified by its ligase activity.

### *B. subtilis* BirA does not require the N-terminal DNA binding domain for normal ligase activity

The *in vitro* data presented above indicate that *B. subtilis* BirA behaves in a manner that strongly parallels that of *E. coli* BirA despite the low sequence similarity of the two proteins. However, *E. coli* BirA has recently been shown to undergo extensive inter-domain communication that is required for full ligase activity [17]. These observations confirm and extend those of Xu and Beckett [16] and demonstrate that the *E. coli* BirA N-terminal domain plays a role in organizing the active site of BirA [17]. Specifically, the wing of the winged HTH structure interacts with the ligase active site biotin binding loop and acts to organize the active site to give high affinity binding of biotin and Bio-5'-AMP [17].

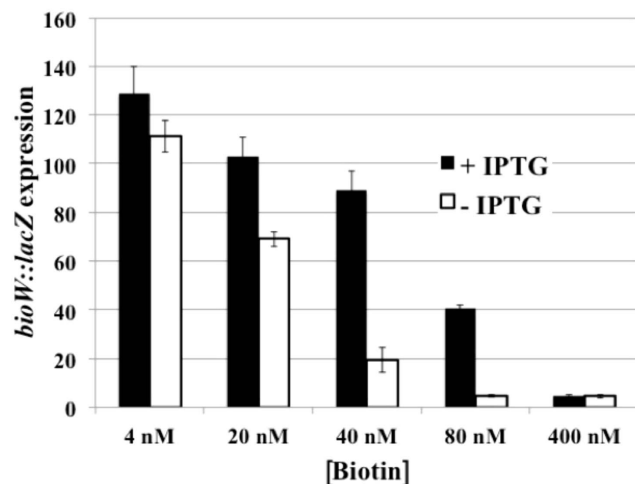

**Figure 10.  $\beta$ -Galactosidase assays of the effect of AccB-86 levels on *bioO*-dependent transcription.** The *bioW::lacZ* spacc *accB-86* strain SKH002 was grown in defined medium supplemented with the indicated concentrations of biotin plus or minus IPTG addition to induce synthesis of the AccB-86 acceptor protein. The results are the average of three independent experiments and the error bars denote standard error of the mean. doi:10.1371/journal.pone.0096757.g010

To determine if another Group II BPL, that of *B. subtilis*, requires such communication of the catalytic and N-terminal domains for full ligase activity, we constructed genes encoding several N-terminal *B. subtilis* BirA deletion proteins. The deletion endpoints were based on structural modeling of *B. subtilis* BirA based on the crystal structure of *S. aureus* BirA (PDB 4DQ2) [7] (Fig. 6). BirA deletions  $\Delta 2-63$  and  $\Delta 2-65$  eliminated the predicted N-terminal domain whereas BirA deletions  $\Delta 2-74$  and  $\Delta 1-81$  also cut into the predicted central catalytic domain. Complementation assays using the *E. coli* *birA1* mutant strain BM4092 and the *E. coli*  $\Delta$ *birA* deletion strain VC618 were used to test the ligase activities of the *B. subtilis* BirA N-terminally deleted proteins. These assays showed that upon expression of the *B. subtilis*  $\Delta 2-63$  BirA,  $\Delta 2-65$  BirA and wild type proteins in strain BM4092 all three BPLs supported growth equally well on medium containing 1.6 nM biotin (the minimal level allowing growth of *E. coli*) (Fig. 7A). These results indicated that the ligase activities of these two deletion proteins were essentially normal. In contrast, upon expression of the *E. coli* BirA lacking its amino terminus ( $\Delta 2-65$  BirA), growth of the transformed strain required a biotin concentration that was 1000-fold greater. The complementation activities of the other two *B. subtilis* deletion proteins, BirA  $\Delta 2-74$  and BirA  $\Delta 1-81$  were either partially (BirA  $\Delta 2-74$ ) or totally (BirA  $\Delta 1-81$ ) compromised (Fig. 7A). To ensure that residual activity of the host BirA1 protein did not play a role in growth restoration we also performed complementation of the  $\Delta$ *birA* *E. coli* strain VC618 and obtained a similar complementation pattern (Fig. 7B).

The ligase activities of the purified *B. subtilis* BirA N-terminal deletion proteins (Fig. 3) were also tested by *in vitro* biotinylation assays. As expected from the complementation results the  $\Delta 2-63$  and  $\Delta 2-65$  BirA proteins showed Bio-5'-AMP synthesis and biotin transfer activities indistinguishable from those of the wild type protein (Fig. 8). In contrast the Bio-5'-AMP synthetic abilities of the  $\Delta 2-74$  and  $\Delta 1-81$  BirAs were significantly reduced relative to wild type BirA. However, the biotin transfer activity of the  $\Delta 2-74$  BirA was comparable to wild type levels. Biotin transfer by the  $\Delta 1-81$  BirA was significantly reduced compared to the wild type protein (Fig. 9). In agreement with prior work [16,17] the *E. coli*  $\Delta 2-65$  BirA was significantly reduced in Bio-5'-AMP synthesis and in biotin transfer (Fig. 8).

### *Bacillus subtilis* BirA dimerizes in the presence of biotin and ATP

Dimerization is required for DNA binding of *E. coli* BirA and dimerization is dependent on biotin and ATP binding. To determine the oligomerization state of *B. subtilis* BirA, purified

BirA was incubated with EGS in the presence or absence of biotin and ATP. Chemical crosslinking indicated that BirA forms a dimer only in the presence of both biotin and ATP (Fig. 9A). Dimerization was also observed for the N-terminally truncated  $\Delta$ 2-65 BirA (Fig. 9B). Note that the characterized Group I BPLs can either be dimeric as is the *Pyrococcus horikoshii* protein [3,41] or monomeric as are the *Mycobacterium tuberculosis* [4], *Aquifex aeolicus* [5] and *Propionibacterium freudenreichii* subsp. *shermanii* [42] BPLs.

### *Bacillus subtilis* BirA follows the *E. coli* BirA regulatory model

In *E. coli* regulation of the biotin biosynthetic gene transcription depends not only on the concentration of biotin but also the levels of unbiotinylated AccB [8–10]. This is an important attribute because biotin is only active in central metabolism when it is protein bound. Hence, the rate of biotin operon transcription is sensitive not only to the intracellular concentration of biotin, but also to the supply of the proteins to which the biotin must be attached. Moreover, accumulation of the unmodified protein increases the rate of biotin synthesis thus ensuring replacement of the biotin consumed in protein modification.

To determine if this regulatory facet also applies to another Group II BPL, we constructed a *B. subtilis* strain that could be used to monitor regulation of biotin operon transcription upon alteration of the levels of the AccB-86 acceptor protein. This strain contains the *bioB141* mutation rendering it a biotin auxotroph, a *bioW-lacZ* transcriptional fusion and an ectopic IPTG-inducible gene encoding AccB-86. This strain was grown in chemically defined media containing various concentrations of biotin. Upon induction of AccB-86 expression with IPTG  $\beta$ -galactosidase assays showed that expression of the biotin operon was derepressed at biotin concentrations that normally cause repression (Fig. 10) in a manner similar to that seen in *E. coli* [8–10].

## Discussion

*B. subtilis* BirA complements the ligase activity of *E. coli* BirA mutant strain BM4092, but fails to complement the regulatory function of *E. coli* BirA. This latter result is not surprising since *E. coli* and *B. subtilis* BirAs bind different operator sequences and have different spacing of the palindromic elements. We have shown that *B. subtilis* BirA is a Group II BPL that binds equally well to the three operators predicted by others (Fig. 4). Binding is observed only in the presence of both biotin and ATP indicating that Bio-5'-AMP is the regulatory ligand. Interestingly, EMSA showed that *B. subtilis* BirA weakly binds *E. coli* *bioO* (Fig. 4I), suggesting some distant relationship between the operators. Similar to *E. coli*, dimerization of *B. subtilis* BirA occurs only in the presence of biotin and ATP, a further indication that Bio-5'-AMP is the regulatory ligand (Fig. 9A). The *B. subtilis*  $\Delta$ 2-65 BirA also formed dimers indicating that the N-terminal domain is not required for dimerization (Fig. 9B).

Deletions of the N-terminal DNA binding domain of *E. coli* BirA result in proteins having only very weak ligase activities indicating inter-domain interactions are required for full ligase activity [16,17]. These interactions have been shown to occur between the wing of the winged HTH domain and the biotin-binding loop of

the catalytic domain. Deletion of only the fourteen-residue wing has as drastic an effect as deletion of the entire N-terminal domain, but was largely restored by insertion of a foreign wing of similar structure [17]. Moreover, a mutation within the wing can restore function to proteins having mutant biotin binding loops [17].

Although the HTH domain of our modeled *B. subtilis* BirA structure includes a wing, the structure is not required for full ligase activity. Both the  $\Delta$ 2-63 and  $\Delta$ 2-65 BirAs lack the entire N-terminal domain but performed the ligase partial reactions as well as the wild type protein both *in vivo* and *in vitro* (Fig. 8). Deletions that entered the predicted catalytic core of the protein resulted in either compromised ( $\Delta$ 2-74 BirA) or highly defective ( $\Delta$ 1-81 BirA) proteins (Fig. 8). The Bio-5'-AMP synthetic ability of the  $\Delta$ 2-74 BirA was significantly decreased, although the protein transferred the biotin moiety normally suggesting that the putative  $\alpha$ -helix near residue 74 may be involved in stabilizing biotin and ATP or Bio-5'-AMP binding. Although *B. subtilis*  $\Delta$ 1-81 BirA failed to replace the *E. coli* ligase *in vivo* (Fig. 7), it retained weak Bio-5'-AMP synthesis and biotin transfer activities (Fig. 8) suggesting that the loop predicted near residue 81 is required for efficient binding of biotin and ATP. These data indicate that unlike *E. coli*, *B. subtilis* BirA does not require an intact N-terminal DNA binding domain for full ligase activity. Instead, the first  $\alpha$ -helix and loop of the modeled central domain seem to be important in binding biotin and ATP.

*E. coli* BirA is a highly dynamic protein as shown both by physical [43–45] and mutational [36] analyses. In the latter case mutations in the catalytic and C-terminal domains as well as in the HTH domain can result in super-repressor phenotypes. These proteins are BirAs that repress *bio* operon expression even at biotin concentrations that normally fail to repress transcription. Although *E. coli* BirA has been studied for over 30 years [40,46] and four different crystal structures have been solved, the details of how the protein binds its operator site remain unknown. Despite much effort in several laboratories no diffraction grade crystals of the operator DNA with liganded *E. coli* BirA have been obtained. This could be due to competing interactions of the N-terminal domain with the catalytic domain and operator giving a mixture of molecular species that preclude crystallization. If so, the apparent lack of such interactions in *B. subtilis* BirA may allow crystallization of this protein with its operator DNA.

The BLAP protein was biotinylated by *B. subtilis* BirA *in vitro* suggesting that BLAP may be the biotin carboxyl carrier protein for a biotin-dependent enzyme. The genes that neighbor *yingHB*, the BLAP encoding gene, are annotated as propionyl-CoA carboxylase subunits. However, a recent report suggests that these genes may comprise a methylcrotonyl-CoA carboxylase involved in leucine degradation [47].

## Acknowledgments

We thank Vandana Chakravarty for purified *E. coli* BirA, *E. coli* AccB-87 plus strains VC618 and VC8.

## Author Contributions

Conceived and designed the experiments: SKH JEC. Performed the experiments: SKH. Analyzed the data: SKH JEC. Contributed reagents/materials/analysis tools: SKH JEC. Wrote the paper: SKH JEC.

## References

- Chapman-Smith A, Cronan JE Jr. (1999) The enzymatic biotinylation of proteins: a post-translational modification of exceptional specificity. *Trends Biochem Sci* 24: 359–363.
- Rodionov DA, Mironov AA, Gelfand MS (2002) Conservation of the biotin regulon and the BirA regulatory signal in Eubacteria and Archaea. *Genome Res* 12: 1507–1516.

3. Bagautdinov B, Matsuura Y, Bagautdinova S, Kunishima N (2008) Protein biotinylation visualized by a complex structure of biotin protein ligase with a substrate. *J Biol Chem* 283: 14739–14750.
4. Purushothaman S, Gupta G, Srivastava R, Ramu VG, Suroliya A (2008) Ligand specificity of group I biotin protein ligase of *Mycobacterium tuberculosis*. *PLoS One* 3: e2320.
5. Tron CM, McNae IW, Nutley M, Clarke DJ, Cooper A, et al. (2009) Structural and functional studies of the biotin protein ligase from *Aquifex aeolicus* reveal a critical role for a conserved residue in target specificity. *J Mol Biol* 387: 129–146.
6. Beckett D (2007) Biotin sensing: universal influence of biotin status on transcription. *Annu Rev Genet* 41: 443–464.
7. Pendini NR, Yap MY, Polyak SW, Cowieson NP, Abell A, et al. (2013) Structural characterization of *Staphylococcus aureus* biotin protein ligase and interaction partners: an antibiotic target. *Protein Sci* 22: 762–773.
8. Abdel-Hamid AM, Cronan JE (2007) Coordinate expression of the acetyl coenzyme A carboxylase genes, *accB* and *accC*, is necessary for normal regulation of biotin synthesis in *Escherichia coli*. *J Bacteriol* 189: 369–376.
9. Cronan JE Jr. (1988) Expression of the biotin biosynthetic operon of *Escherichia coli* is regulated by the rate of protein biotinylation. *J Biol Chem* 263: 10332–10336.
10. Solbiati J, Cronan JE (2010) The switch regulating transcription of the *Escherichia coli* biotin operon does not require extensive protein-protein interactions. *Chem Biol* 17: 11–17.
11. Beckett D (2009) Biotin sensing at the molecular level. *J Nutr* 139: 167–170.
12. Cronan J (2014) Biotin and Lipoic Acid: Synthesis, Attachment, and Regulation. In: Stewart V, Begley T, editors. *EcoSal Plus* 2014. doi:10.1128/ecosalplus.3.6.3.5.
13. Weaver LH, Kwon K, Beckett D, Matthews BW (2001) Corepressor-induced organization and assembly of the biotin repressor: a model for allosteric activation of a transcriptional regulator. *Proc Natl Acad Sci U S A* 98: 6045–6050.
14. Wilson KP, Shewchuk LM, Brennan RG, Otsuka AJ, Matthews BW (1992) *Escherichia coli* biotin holoenzyme synthetase/bio repressor crystal structure delineates the biotin- and DNA-binding domains. *Proc Natl Acad Sci U S A* 89: 9257–9261.
15. Wood ZA, Weaver LH, Brown PH, Beckett D, Matthews BW (2006) Corepressor induced order and biotin repressor dimerization: a case for divergent followed by convergent evolution. *J Mol Biol* 357: 509–523.
16. Xu Y, Beckett D (1996) Evidence for interdomain interaction in the *Escherichia coli* repressor of biotin biosynthesis from studies of an N-terminal domain deletion mutant. *Biochemistry* 35: 1783–1792.
17. Chakravarty V, Cronan JE (2013) The wing of a winged helix-turn-helix transcription factor organizes the active site of BirA, a bifunctional repressor/ligase. *J Biol Chem* 288: 36029–36039.
18. Bower S, Perkins J, Yocum RR, Serron P, Sorokin A, et al. (1995) Cloning and characterization of the *Bacillus subtilis* *birA* gene encoding a repressor of the biotin operon. *J Bacteriol* 177: 2572–2575.
19. Lee JM, Zhang S, Saha S, Santa Anna S, Jiang C, et al. (2001) RNA expression analysis using an antisense *Bacillus subtilis* genome array. *J Bacteriol* 183: 7371–7380.
20. Bernstsson RP, ter Beek J, Majnsnerowska M, Duurkens RH, Puri P, et al. (2012) Structural divergence of paralogous S components from ECF-type ABC transporters. *Proc Natl Acad Sci U S A* 109: 13990–13995.
21. Hebbeln P, Rodionov DA, Alfandega A, Eitinger T (2007) Biotin uptake in prokaryotes by solute transporters with an optional ATP-binding cassette-containing module. *Proc Natl Acad Sci U S A* 104: 2909–2914.
22. Cui G, Nan B, Hu J, Wang Y, Jin C, et al. (2006) Identification and solution structures of a single domain biotin/lipoyl attachment protein from *Bacillus subtilis*. *J Biol Chem* 281: 20598–20607.
23. Christensen QH, Martin N, Mansilla MC, de Mendoza D, Cronan JE (2011) A novel amidotransferase required for lipoic acid cofactor assembly in *Bacillus subtilis*. *Mol Microbiol* 80: 350–363.
24. Anagnostopoulos C, Spizizen J (1961) Requirements for transformation in *Bacillus subtilis*. *J Bacteriol* 81: 741–746.
25. Dubnau D, Davidoff-Abelson R (1971) Fate of transforming DNA following uptake by competent *Bacillus subtilis*. I. Formation and properties of the donor-recipient complex. *J Mol Biol* 56: 209–221.
26. Harwood CR, Cutting SM (1990) *Molecular biological methods for Bacillus*. Chichester ; New York: Wiley.
27. Zdobnov EM, Apweiler R (2001) InterProScan—an integration platform for the signature-recognition methods in InterPro. *Bioinformatics* 17: 847–848.
28. Arnold K, Bordoli L, Kopp J, Schwede T (2006) The SWISS-MODEL workspace: a web-based environment for protein structure homology modelling. *Bioinformatics* 22: 195–201.
29. Kiefer F, Arnold K, Kunzli M, Bordoli L, Schwede T (2009) The SWISS-MODEL Repository and associated resources. *Nucleic Acids Res* 37: D387–392.
30. Peitsch MC (1996) ProMod and Swiss-Model: Internet-based tools for automated comparative protein modelling. *Biochem Soc Trans* 24: 274–279.
31. Pettersen EF, Goddard TD, Huang CC, Couch GS, Greenblatt DM, et al. (2004) UCSF Chimera—a visualization system for exploratory research and analysis. *J Comput Chem* 25: 1605–1612.
32. Gouet P, Robert X, Courcelle E (2003) ESPript/ENDscript: Extracting and rendering sequence and 3D information from atomic structures of proteins. *Nucleic Acids Res* 31: 3320–3323.
33. Barker DF, Campbell AM (1980) Use of *bio-lac* fusion strains to study regulation of biotin biosynthesis in *Escherichia coli*. *J Bacteriol* 143: 789–800.
34. Miller JH (1972) *Experiments in molecular genetics*. Cold Spring Harbor, N.Y.: Cold Spring Harbor Laboratory. xvi, 466 p.p.
35. Somerville RL, Shieh TL, Hagewood B, Cui JS (1991) Gene expression from multicopy T7 promoter vectors proceeds at single copy rates in the absence of T7 RNA polymerase. *Biochem Biophys Res Commun* 181: 1056–1062.
36. Chakravarty V, Cronan JE (2012) Altered regulation of *Escherichia coli* biotin biosynthesis in BirA superrepressor mutant strains. *J Bacteriol* 194: 1113–1126.
37. Rock CO, Cronan JE Jr. (1980) Improved purification of acyl carrier protein. *Anal Biochem* 102: 362–364.
38. Chapman-Smith A, Turner DL, Cronan JE Jr., Morris TW, Wallace JC (1994) Expression, biotinylation and purification of a biotin-domain peptide from the biotin carboxy carrier protein of *Escherichia coli* acetyl-CoA carboxylase. *Biochem J* 302: 881–887.
39. Christner JE, Schlesinger MJ, Coon MJ (1964) Enzymatic activation of biotin. Biotinyl adenylate formation. *J Biol Chem* 239: 3997–4005.
40. Prakash O, Eisenberg MA (1979) Biotinyl 5'-adenylate: corepressor role in the regulation of the biotin genes of *Escherichia coli* K-12. *Proc Natl Acad Sci U S A* 76: 5592–5595.
41. Daniels KG, Beckett D (2010) Biochemical properties and biological function of a monofunctional microbial biotin protein ligase. *Biochemistry* 49: 5358–5365.
42. Shenoy BC, Wood HG (1988) Purification and properties of the synthetase catalyzing the biotinylation of the apobiotin of transcarboxylase from *Propionibacterium shermanii*. *FASEB J* 2: 2396–2401.
43. Streaker ED, Beckett D (1998) A map of the biotin repressor-biotin operator interface: binding of a winged helix-turn-helix protein dimer to a forty base-pair site. *J Mol Biol* 278: 787–800.
44. Streaker ED, Beckett D (1998) Coupling of site-specific DNA binding to protein dimerization in assembly of the biotin repressor-biotin operator complex. *Biochemistry* 37: 3210–3219.
45. Xu Y, Nenortas E, Beckett D (1995) Evidence for distinct ligand-bound conformational states of the multifunctional *Escherichia coli* repressor of biotin biosynthesis. *Biochemistry* 34: 16624–16631.
46. Barker DF, Campbell AM (1981) Genetic and biochemical characterization of the *birA* gene and its product: evidence for a direct role of biotin holoenzyme synthetase in repression of the biotin operon in *Escherichia coli*. *J Mol Biol* 146: 469–492.
47. Hsiao TL, Revelles O, Chen L, Sauer U, Vitkup D (2010) Automatic policing of biochemical annotations using genomic correlations. *Nat Chem Biol* 6: 34–40.
48. Cronan JE (2006) A family of arabinose-inducible *Escherichia coli* expression vectors having pBR322 copy control. *Plasmid* 55: 152–157.
49. Vagner V, Dervyn E, Ehrlich SD (1998) A vector for systematic gene inactivation in *Bacillus subtilis*. *Microbiology* 144: 3097–3104.
